# Supplementary material for: Antamanide Analogs as Potential Inhibitors of Tyrosinase
Source: MDPI journal article supplement (doi:10.3390/ijms23116240), 2022-06-02
Supplement: s1 [file s1]

# Antamanide Analogs as Potential Inhibitors of Tyrosinase

Claudia Honisch <sup>1</sup>, Matteo Gazziero <sup>1</sup>, Roberto Dallochio <sup>2</sup>, Alessandro Dessì <sup>2</sup>, Davide Fabbri <sup>2</sup>, Maria Antonietta Dettori <sup>2</sup>, Giovanna Delogu <sup>2</sup> and Paolo Ruzza <sup>1,\*</sup>

<sup>1</sup> Institute of Biomolecular Chemistry of CNR, Padova Unit, 35131 Padova, Italy;  
c.honisch@icb.cnr.it (C.H.); matteo.gazziero@gmail.com (M.G.)

<sup>2</sup> Institute of Biomolecular Chemistry of CNR, Sassari Unit, 07100 Sassari, Italy;  
roberto.dallochio@icb.cnr.it (R.D.); alessandro.dessi@cnr.it (A.D.);  
davidegaetano.fabbri@cnr.it (D.F.); mariaantonietta.dettori@cnr.it (M.A.D.);  
giovanna.delogu@icb.cnr (G.D.)

\* Correspondence: paolo.ruzza@cnr.it; Tel.: +39-049-827-5282

## Supplementary Material

**Table S1.** Docking list of cyclopeptides with amino acids of catalytic site of *B. megaterium* tyrosinase protein (3NM8).

|          | Tested ligands       | %  | M.B.E. <sup>a</sup> | E.F.E.B. <sup>b</sup> | E.I.C., Ki <sup>c</sup> | Interactions, HBond                                                                                                      |
|----------|----------------------|----|---------------------|-----------------------|-------------------------|--------------------------------------------------------------------------------------------------------------------------|
| <b>1</b> | Antamanide.1.c36.r16 | 36 | -7.05               | -7.62                 | 2.59 uM                 | Asp55 Met61 Met184 Phe197 Asn199 Gly200 Pro201 Asn205 <b>Arg209</b> Gly216 Val217 <b>Val218</b>                          |
|          | Antamanide.2.c21.r10 | 21 | -6.82               | -7.48                 | 3.27 uM                 | Met61 Met184 Phe197 Asn199 Gly200 Asn205 <b>Arg209</b> Gly216 Val217                                                     |
|          | Antamanide.5.c14.r44 | 14 | -6.70               | -6.84                 | 9.64 uM                 | Met61 Lys157 <b>Glu158</b> Arg209 Gly212 Gly213 Gly216 Val217 <b>Val218</b> Pro219                                       |
| <b>2</b> | AG6.1.c20.r33        | 20 | -6.80               | -7.92                 | 1.57 uM                 | Gly46 Lys47 His49 Asp55 Met61 Met184 Phe197 Gly200 Pro201 His204 Asn205 His208 Arg209 Gly216 Val217 <b>Val218</b> Pro219 |
|          | AG6.4.c30.r66        | 30 | -6.45               | -7.04                 | 6.89 uM                 | Met61 Met184 Phe197 Gly200 Pro201 Asn205 His208 Arg209 Gly216 Val217 Val218                                              |
| <b>3</b> | AG9.3.c28.r85        | 28 | -5.29               | -6.52                 | 16.71 uM                | Gly46 Lys47 Asp55 Met61 Met184 Phe197 Asn205 Arg209 Gly216 Val217 Val218 Pro219                                          |
|          | AG9.5.c15.r27        | 15 | -5.62               | -6.19                 | 29.00 uM                | Gly46 His49 Asp55 Asn57 His60 Met61 Phe197 Asn205 Arg209 Gly216 Val217 <b>Val218</b> Pro219                              |
|          | AG9.12.c33.r20       | 33 | -4.89               | -4.92                 | 245.95 uM               | Met61 Glu158 Met184 Phe197 Pro201 <b>Arg209</b> Gly216 Val217 Val218 Pro219                                              |
| <b>4</b> | AOG9.1.c99.r28       | 99 | -7.31               | -7.55                 | 2.90 uM                 | His60 Met61 Phe197 Pro201 His204 Asn205 <b>Arg209</b> Gly216 Val217 Val218 Pro219                                        |
| <b>5</b> | PS-A.2.c10.r49       | 10 | -5.89               | -5.94                 | 44.51 uM                | <b>Gly196</b> Phe197 Gly200 Pro201 <b>Asn205</b> His208 <b>Arg209</b> Gly216 Val217 <b>Val218</b>                        |
|          | PS-A.5.c22.r7        | 22 | -5.80               | -5.89                 | 48.12 uM                | His60 Met184 Phe197 Gly200 Pro201 His204 Asn205 His208 <b>Arg209</b> Gly216 Val217 Val218                                |
|          | PS-A.6.c24.r15       | 24 | -5.73               | -5.76                 | 59.86 uM                | Gly46 Asn57 His60 Met61 <b>Glu158</b> Phe197 Pro201 <b>Arg209</b> Gly216 Val217 <b>Val218</b>                            |
| <b>6</b> | KojicAcid.1.c13.r51  | 13 | -4.22               | -4.23                 | 789.57 uM               | His60 <b>Glu195</b> His204 <b>Asn205</b> His208 <b>Gly216</b> Val218                                                     |
|          | KojicAcid.2.c60.r16  | 60 | -3.70               | -4.00                 | 1.17 mM                 | His204 <b>Asn205</b> His208 <b>Arg209</b> Gly216                                                                         |
|          | KojicAcid.3.c12.r100 | 12 | -3.51               | -3.56                 | 2.47 mM                 | <b>Glu158</b> Phe197 Gly200 Pro201 <b>Arg209</b>                                                                         |
|          | KojicAcid.4.c8.r91   | 8  | -3.49               | -3.50                 | 2.72 mM                 | <b>Asn205</b> His208 <b>Arg209</b> Gly216 Val217 <b>Val218</b>                                                           |

<sup>a</sup> M.B.E.: Mean Binding Energy,

<sup>b</sup> E.F.E.B.: Estimated Free Energy of Binding,

<sup>c</sup> E.I.C., Ki: Estimated Inhibition Constant, Ki.

**Table S2.** H-bonds list of cyclopetides with amino acids of catalytic site of *B. megaterium* Tyrosinase protein (3NM8)

**Hydrogen bond interactions**

| pose | Tested Ligands | %  | H-bond | Ligand Atom                                           | Protein Atom                                                        | Distance (Å) <sup>c</sup>        | Ang. (°) <sup>c</sup>                |
|------|----------------|----|--------|-------------------------------------------------------|---------------------------------------------------------------------|----------------------------------|--------------------------------------|
| 1    | Antamanide     | 36 | 2      | O58(OA) <sup>a</sup><br>O39(OA)                       | Arg209:1HH1(HD)<br>Val218:HN(HD)                                    | 2.294<br>2.238                   | 151.22<br>157.69                     |
| 2    |                | 21 | 1      | O29(OA)                                               | Arg209:1HH1(HD)                                                     | 2.261                            | 143.86                               |
| 5    |                | 14 | 2      | O39(OA)<br>O9(OA)                                     | Glu158:HN(HD)<br>Val218:HN(HD)                                      | 1.905<br>2.072                   | 136.71<br>145.82                     |
| 1    | AG6            | 20 | 1      | O58(OA)                                               | Val218:HN(HD)                                                       | 2.557                            | 114.15                               |
| 4    |                | 30 | 0      | -----                                                 | -----                                                               | -----                            | -----                                |
| 3    | AG9            | 28 | 0      | -----                                                 | -----                                                               | -----                            | -----                                |
| 5    |                | 15 | 1      | O29(OA)                                               | Val218:HN(HD)                                                       | 1.832                            | 142.89                               |
| 12   |                | 33 | 1      | O46(OA)                                               | Arg209:HE(HD)                                                       | 2.181                            | 161.25                               |
| 1    | AOG9           | 99 | 2      | O37(OA)<br>O43(OA)                                    | Arg209:1HH1(HD)<br>Arg209:2HH1(HD)                                  | <b>2.091</b><br><b>2.470</b>     | <b>125.99</b><br><b>174.94</b>       |
| 2    | PS-A           | 10 | 4      | H37(HD) <sup>b</sup><br>H37(HD)<br>O15(OA)<br>O27(OA) | Gly196:O(OA)<br>Asn205:OD1(OA)<br>Arg209:HE(HD)<br>Val218:HN(HD)    | 2.486<br>2.093<br>2.487<br>1.623 | 82.60<br>140.87<br>83.07<br>171.78   |
| 5    |                | 22 | 1      | O10(OA)                                               | Arg209:1HH1(HD)                                                     | 2.006                            | 118.38                               |
| 6    |                | 24 | 3      | H37(HD)<br>O36(OA)<br>O10(OA)                         | Glu158:OE2:(OA)<br>Arg209:1HH1(HD)<br>Val218:HN(HD)                 | 2.022<br>1.916<br>1.979          | 158.66<br>164.36<br>172.48           |
| 1    | Kojic Acid     | 13 | 3      | H10(HD)<br>O9(OA)<br>H12(HD)                          | Glu195:OE1(OA)<br>Asn205:1HD2(HD)<br>Gly216:O(OA)                   | 2.000<br>1.855<br>2.212          | 162.49<br>147.85<br>111.59           |
| 2    |                | 60 | 2      | H10(HD)<br>O9(OA)                                     | Asn205:O(OA)<br>Arg209:2HH1(HD)                                     | 2.129<br>2.152                   | 137.75<br>162.22                     |
| 3    |                | 12 | 4      | H10(HD)<br>H12(HD)<br>O11(OA)<br>O9(OA)               | Glu158:OE2:(OA)<br>Phe197:O(OA)<br>Gly200:HN(HD)<br>Arg209:1HH1(HD) | 2.075<br>2.061<br>2.416<br>1.862 | 111.96<br>150.81<br>135.33<br>168.53 |
| 4    |                | 8  | 3      | H12(HD)<br>O7(OA)<br>O9(OA)                           | Asn205:O(OA)<br>Arg209:2HH1(HD)<br>Val218:HN(HD)                    | 1.770<br>2.116<br>2.062          | 136.66<br>162.37<br>165.48           |

<sup>a</sup> Oxygen acceptor, <sup>b</sup> Hydrogen donor, <sup>c</sup> Cross-bridge H-bond interactions with the same aa are listed in bold.

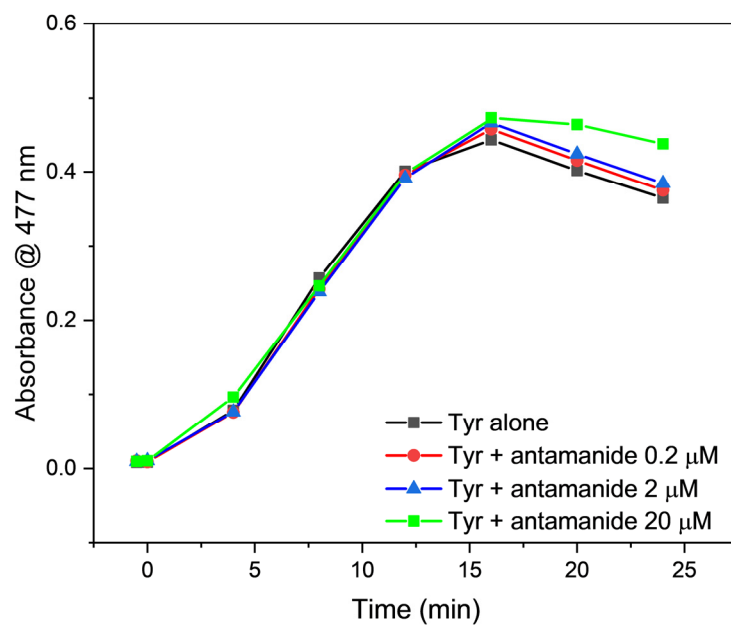

**Figure S1.** Influence of antamanide (at different concentrations, indicated) on the time-course of tyrosine oxidation by the tyrosinase/ $O_2$  oxidizing system.

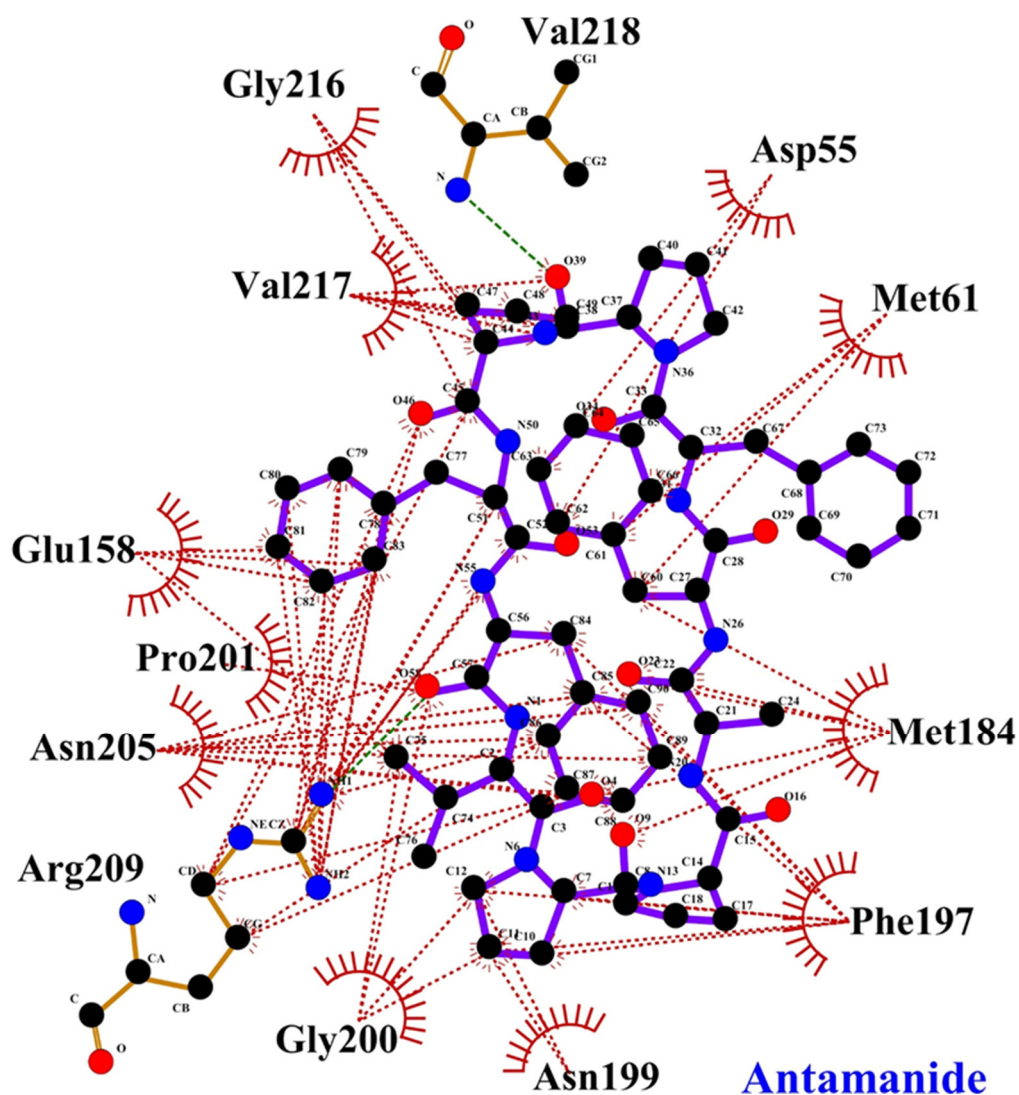

**Figure S2.** Hydrophobic interactions of the lowest docking pose of Antamanide with the catalytic site of *B. megaterium* tyrosinase protein (3NM8) and performed with LigPlot+ [Laskowski, R. A.; Swindells, M.B. LigPlot+: Multiple ligand-protein interaction diagrams for drug discovery. *J. Chem. Inf. Model.* **2011**, 51, 2778–2786.].

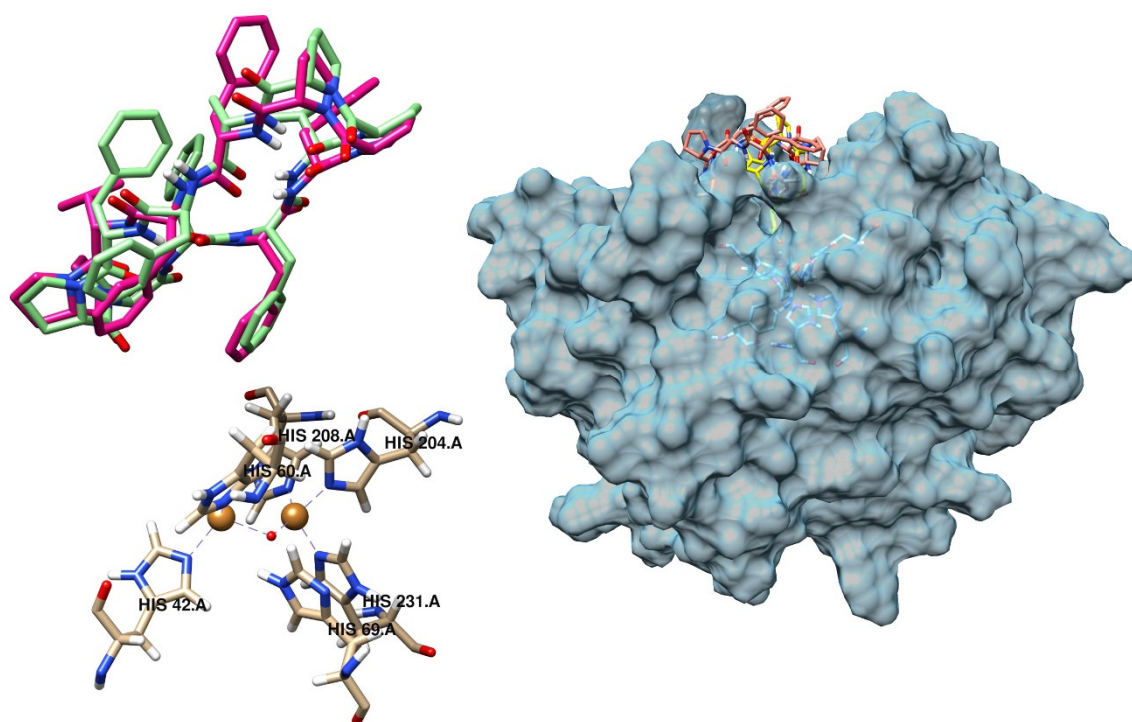

**Figure S3.** Interaction between amino acids residues and the two best poses of Antamanide (green and pink stick). Catalytic site of Tyrosinase enzyme and the two best poses of Antamanide (left) and in the presence of the whole projection of the protein (right).

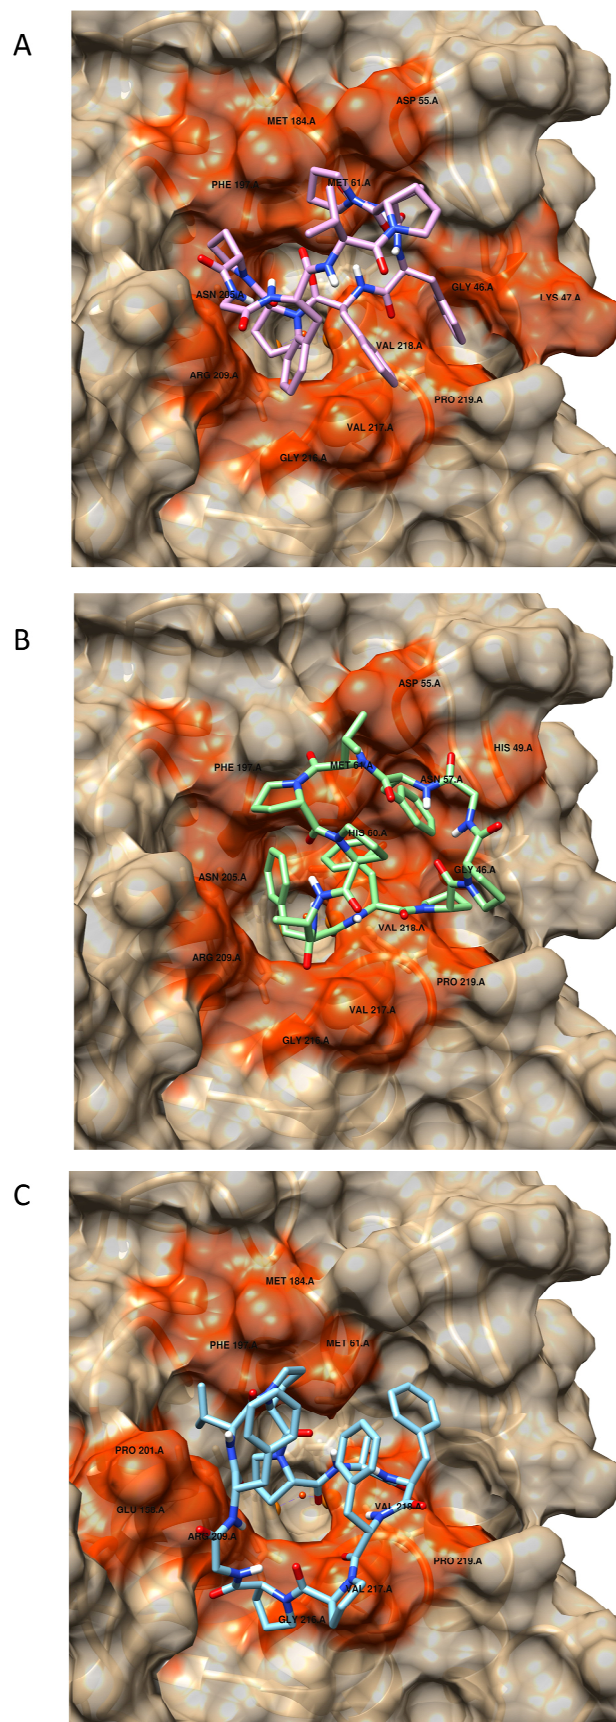

**Figure S4.** Interaction between amino acids residues at the entrance of the catalytic site of *B. megaterium* Tyrosinase and the different pose 3.c28 (A), 5.c15 (B) and 12.c33 (C) of AG9.
